# Supplementary material for: A dual-emissive fluorescent sensor fabricated by encapsulating quantum dots and carbon dots into metal–organic frameworks for the ratiometric detection of Cu2+ in tap water
Source: Royal Society of Chemistry journal article supplement (doi:10.1039/c7tc01970j), 2017-01-01
Supplement: c7tc01970j1.pdf [file c7tc01970j1.pdf]

## Electronic Supplementary Information

### **Dual-emissive fluorescent sensor fabricated by encapsulating quantum dots and carbon dots into metal–organic frameworks for ratiometric detection of Cu<sup>2+</sup> in tap water**

Yujie Ma, Guanhong Xu, Fangdi Wei, Yao Cen, Yunsu Ma, Yueyue Song,

Xiaoman Xu, Menglan Shi, Muhammad Sohail, Qin Hu\*

□ School of pharmacy, Nanjing medical university, Nanjing, Jiangsu 211166, PR

China

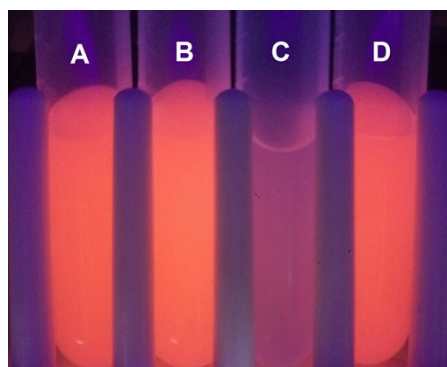

**Fig. S1** Photographs of the mixture of QDs/CDs and ZIF-8 (A) and QDs/CDs@ZIF-8 composite (B) before washing, the mixture of QDs/CDs and ZIF-8 (C) and QDs/CDs@ZIF-8 composite (D) after washing.

---

\* Corresponding author: Tel. / fax: +86-2586868468; E-mail: huqin@njmu.edu.cn

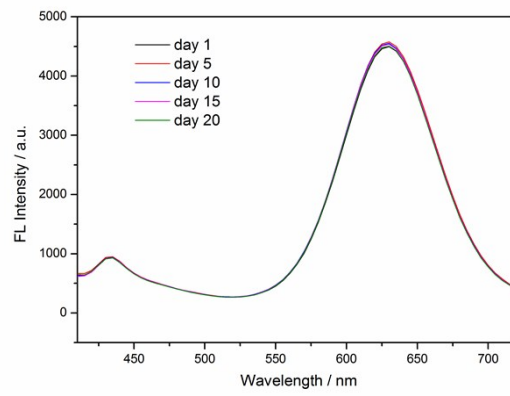

**Fig. S2** Long-term stability of QDs/CDs@ZIF-8 composite.

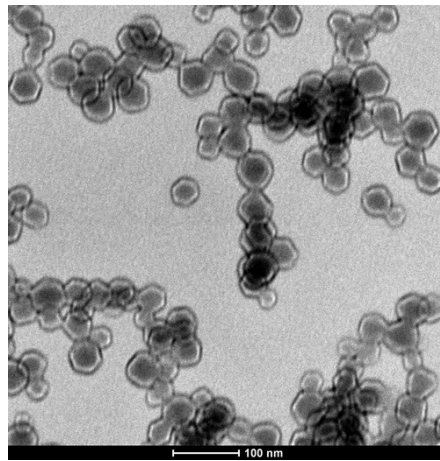

**Fig. S3** TEM image of QDs/CDs@ZIF-8 composite.

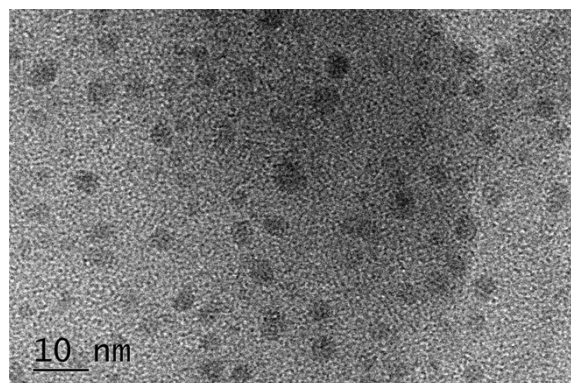

**Fig. S4** TEM image of QDs.

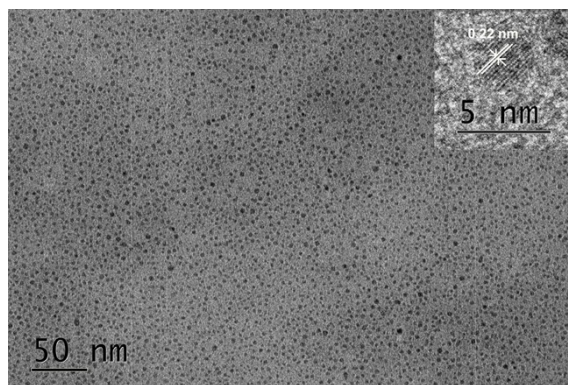

Fig. S5 TEM image of CDs.

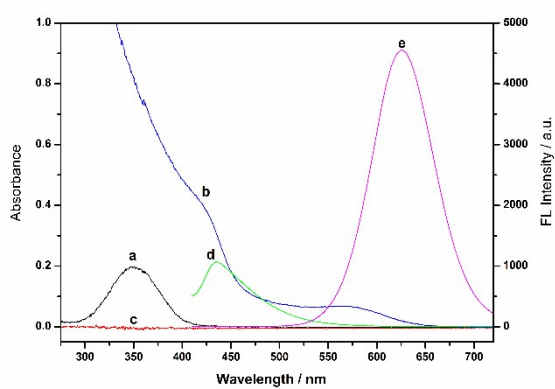

Fig. S6 UV-vis absorption spectra of CDs (a), QDs (b), Cu<sup>2+</sup> ions (c) and fluorescence emission spectra of CDs (d), QDs (e).

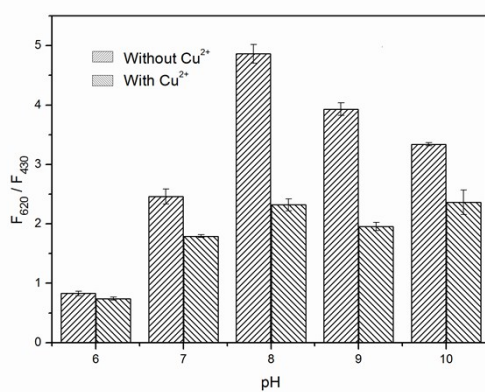

Fig. S7 Fluorescence responses of QDs/CDs@ZIF-8 in the absence and presence of Cu<sup>2+</sup> at different pH values.

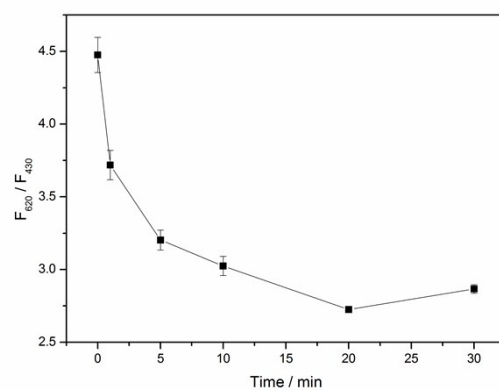

**Fig. S8** Effect of incubation time.

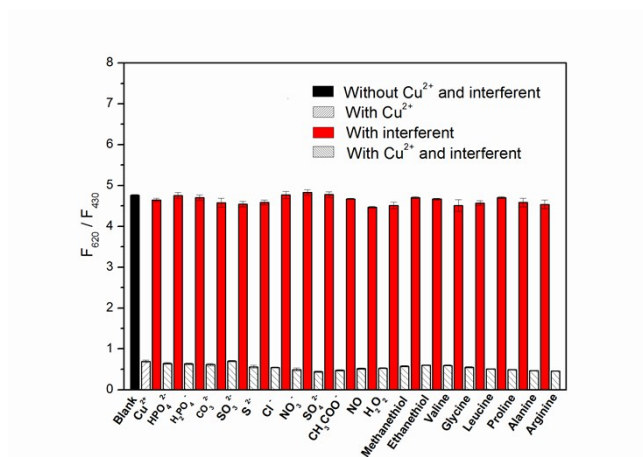

**Fig. 9** Selectivity of the QDs/CDs@ZIF-8 based sensor for Cu<sup>2+</sup> over interferents. The concentrations of QDs/CDs@ZIF-8 and interferents were 15  $\mu$ g/mL and 10  $\mu$ M, respectively.
